# Supplementary material for: Inhibition of Cbl-b restores effector functions of human intratumoral NK cells
Source: PubMed Central journal article supplement — J Immunother Cancer. 2024 Nov 17;12(11):e009860. doi: 10.1136/jitc-2024-009860 (PMC11574514; doi:10.1136/jitc-2024-009860), 2024-11-17
Supplement: jitc-12-11-s001.pdf [file jitc-12-11-s001.pdf]

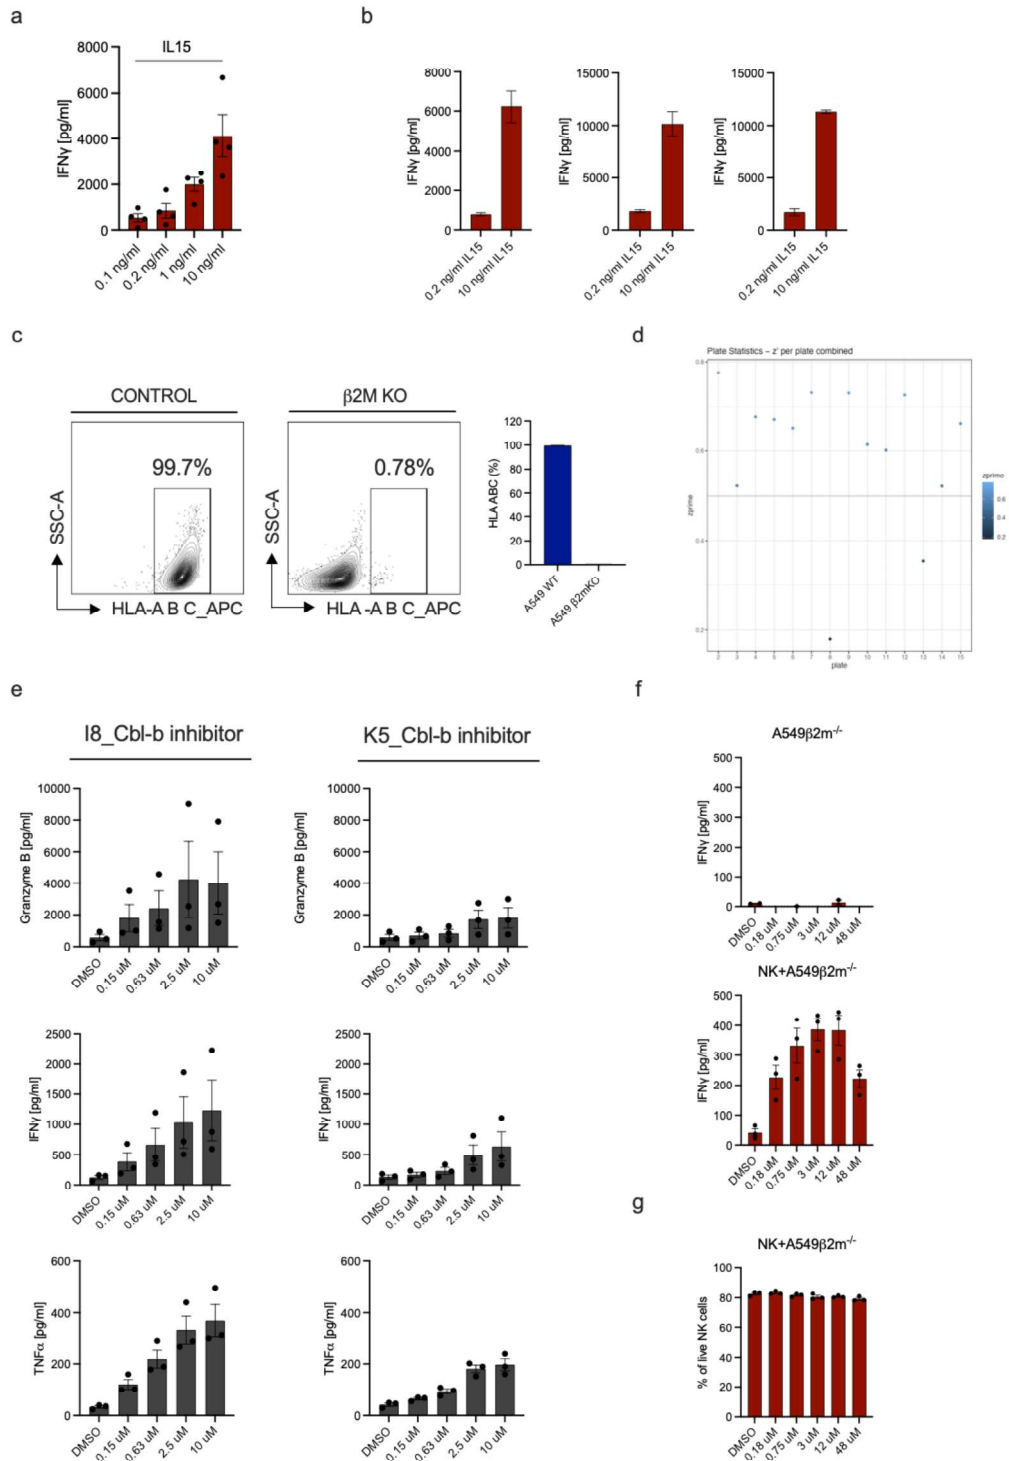

**FIGURE S1 Small molecule library screening set up** a) IFN- $\gamma$  concentration following IL15 titration on primary NK and A549  $\beta 2m^{-/-}$  co-culture (n=4). b) IFN- $\gamma$  secretion of primary human NK cell (n=3) to suboptimal and optimal IL15 concentrations. IFN- $\gamma$  was measured with a screening optimized ELISA approach after overnight co-culture of NK cells and A549  $\beta 2m^{-/-}$  cell

line. c) Flow cytometry histogram and statistics of HLA-ABC expression in CRISPR generated A549  $\beta 2m^{-/-}$  d) Z prime value across screening plates. e) Granzyme B, IFN- $\gamma$  and TNF- $\alpha$  concentrations following dose response treatment of I8 and K5 Cbl-b inhibitors compounds on primary NK cells in co-culture with A549  $\beta 2m^{-/-}$  (n=3). f) IFN- $\gamma$  concentration after Cbl-b inhibitor titration on A549 $\beta 2m^{-/-}$  or co-culture with primary human NK cells (n=3). g) Toxicity of Cbl-b inhibitor following titration (n=3).

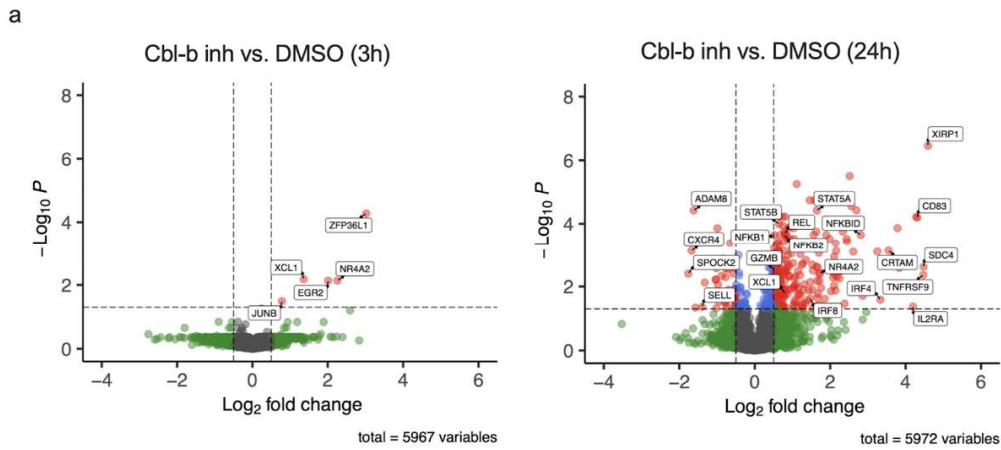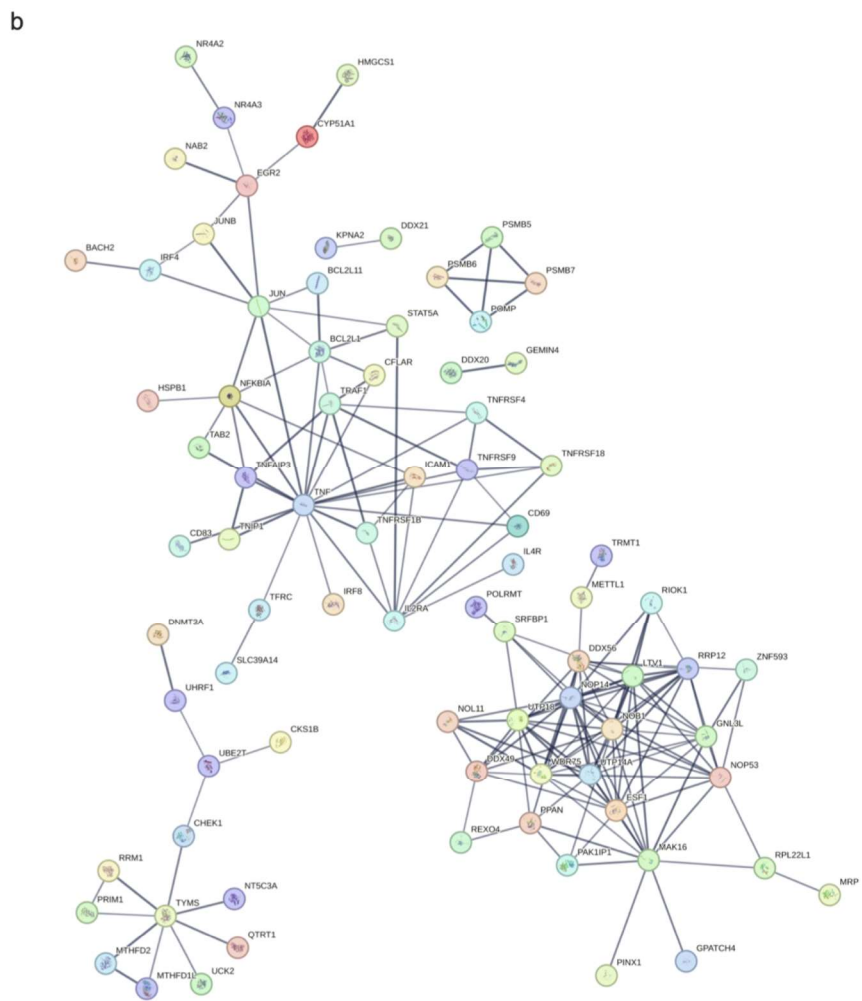

**FIGURE S2 Proteomics short (3h) vs. long (24h) Cbl-b inhibitor treatment.** a) Volcano plots displaying differentially expressed proteins following Cbl-b inhibitor treatment, comparing 3 h and 24 h treatments (n=6; grey=NS, green=Log<sub>2</sub> FC, blue= adjusted P value, red= Log<sub>2</sub> FC and adjusted P value. For statistical analyses see "Material and methods"). b) Multiple protein interaction analysis of top upregulated proteins (log<sub>2</sub>FC >1, p value <0.05).

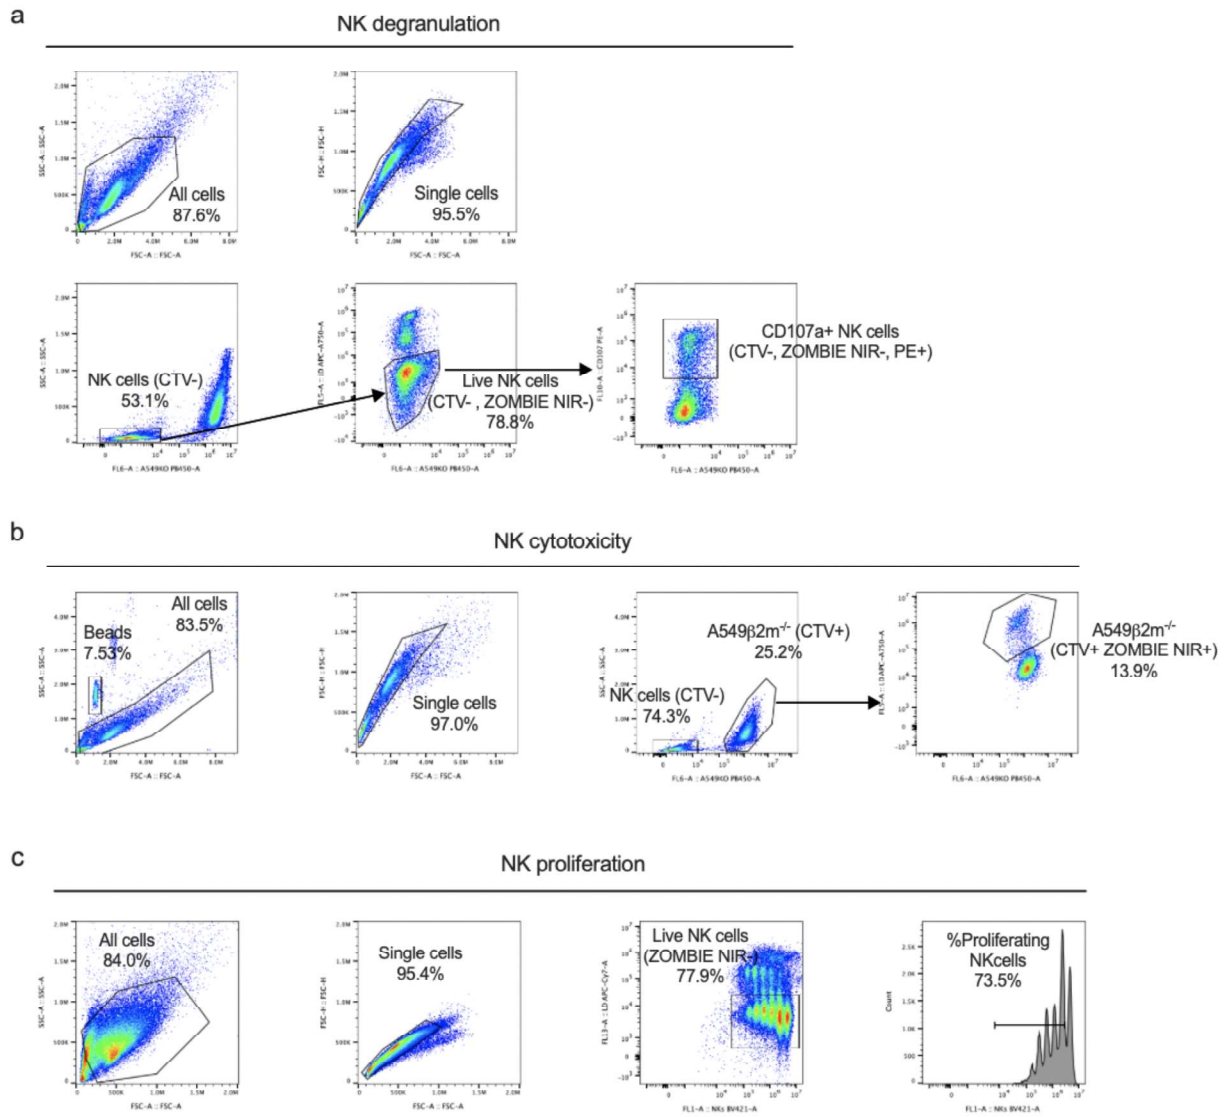

**FIGURE S3 Gating strategy of NK functional assays.** a) Example of gating strategy to calculate NK cell degranulation (CD107a). b) Example of gating strategy to calculate NK cell mediated killing. c) Example of gating strategy to assess NK proliferation.

a

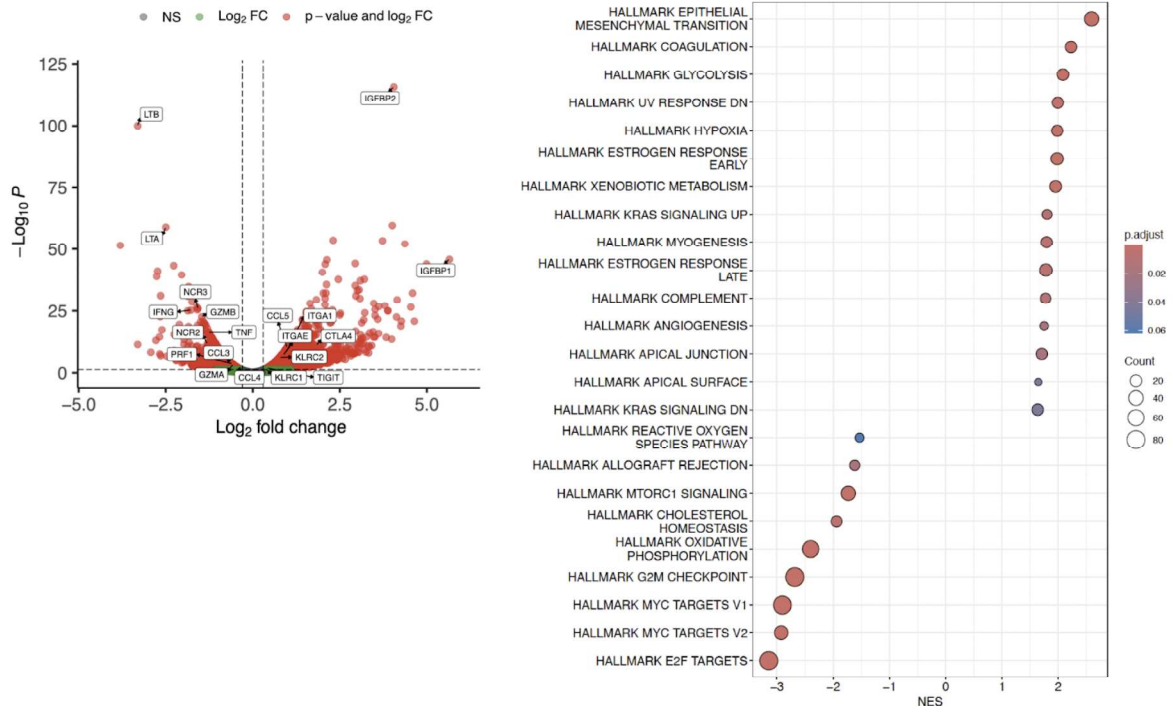

**FIGURE S4 Bulk RNAseq of *in vitro* generated dysfunctional NK cells.** a) Volcano plot of differentially expressed genes in NKD9 compared to NKD0 and hallmarks enrichment analysis of *in vitro* generated dysfunctional NK cells (n=6).

a

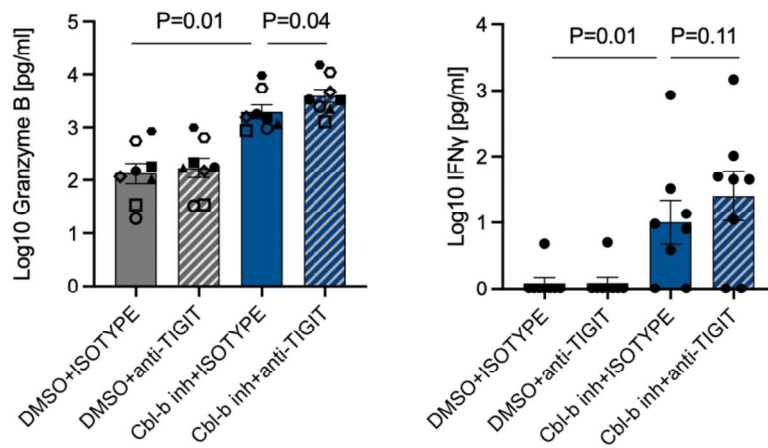

**FIGURE S5 Cytokines production of *in vitro* generated dysfunctional NK cells after treatment.** a) IFN- $\gamma$  and granzyme B supernatant concentrations of Cbl-b inhibitor and anti-TIGIT treated *in vitro* generated dysfunctional NK cells (n=8, for P values see "Material and methods").

a

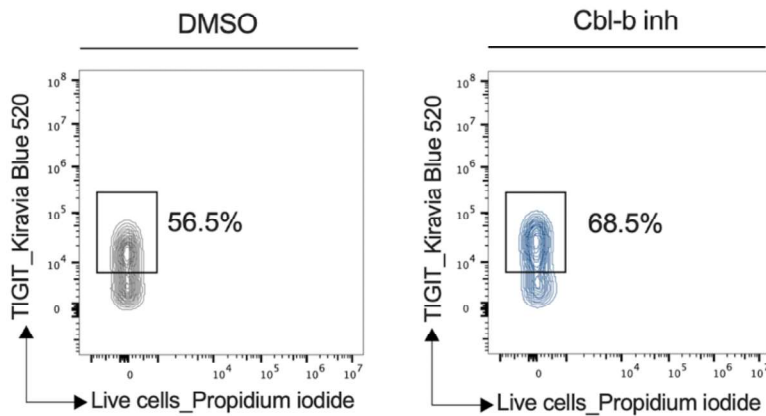

b

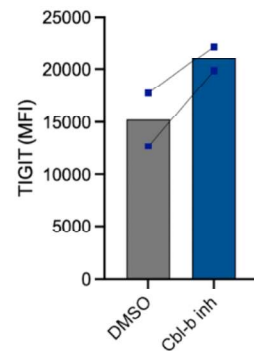

**FIGURE S6 TIGIT upregulation on tumor infiltrating NK cells after Cbl b inhibitor treatment.** a) Representative flow cytometry plot of TIGIT expression (%) on tumor infiltrating NK cells after Cbl-b inhibitor treatment. b) TIGIT expression on tumor infiltrating NK cells after Cbl-b inhibitor treatment of lung cancer patients (n=2, lung adenocarcinoma pleural effusions).
